# Supplementary material for: Detection of vasodilator drugs through microwave spectroscopy of Au NP colorimetric probes using a microwave metallic photonic crystal-inspired resonant probe
Source: Royal Society of Chemistry journal article supplement (doi:10.1039/c7ra04074a), 2017-01-01
Supplement: c7ra04074a1.pdf [file c7ra04074a1.pdf]

# Detection of Vasodilator Drugs through Microwave Spectroscopy of Au NP Colorimetric Probes Using Microwave Metallic Photonic Crystal-Inspired Resonant Probe

Rahul Yadav<sup>1</sup>, Piyush N. Patel<sup>2</sup>, V. N. Lad<sup>\*3</sup>

<sup>1,2</sup>Sensor Research Laboratory, Electronics Engineering Department, Sardar Vallabhbhai National Institute of Technology, Surat, 395007, India.

<sup>3</sup>Chemical Engineering Department, Sardar Vallabhbhai National Institute of Technology, Surat, 395007, India.

**Email:** rrahulyadav01@gmail.com<sup>1</sup>, piyushsvnit@gmail.com<sup>2</sup>, vnl@ched.svnit.ac.in<sup>3</sup>

ESI Table 1 Details of the two vasodilator drugs.

| Parameters       | Drug                                                                                |                                                                                       |
|------------------|-------------------------------------------------------------------------------------|---------------------------------------------------------------------------------------|
|                  | Amlodipine Besylate                                                                 | Minoxidil                                                                             |
| Structure        | 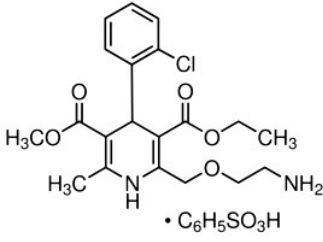 |  |
| Molecular Weight | 567.05                                                                              | 209.25                                                                                |
| pKa Value        | 8.6                                                                                 | 4.61                                                                                  |

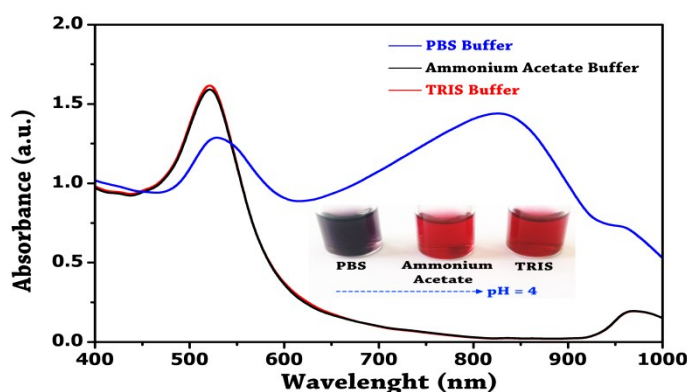

ESI Fig. 1 UV-visible absorption plot of Au NPs in the presence of PBS, ammonium acetate and TRIS buffer media at pH 4.

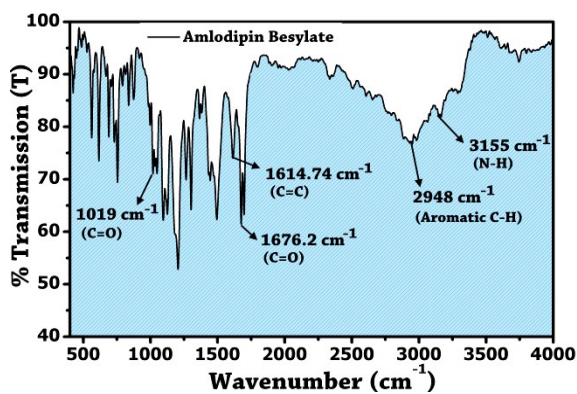

(a)

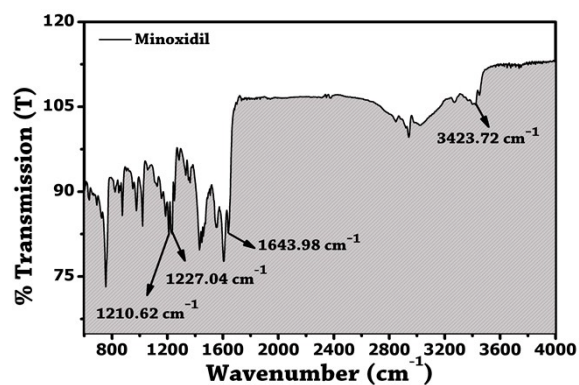

(c)

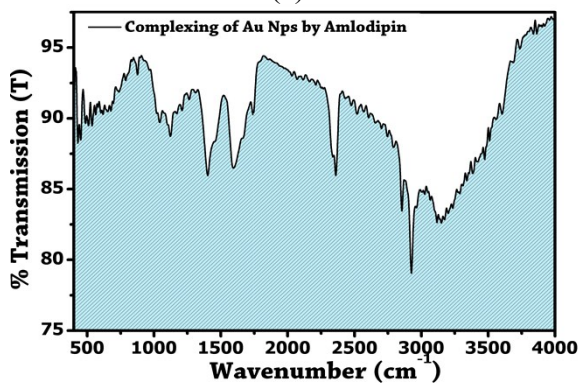

(b)

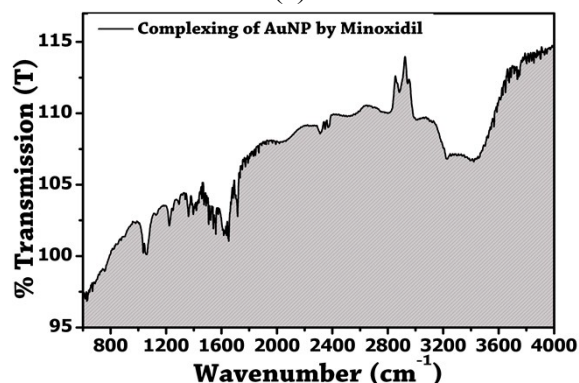

(d)

ESI Fig. 2 FT-IR spectra. (a) Pure amlodipine besylate. (b) Au NPs aggregation in the presence amlodipine besylate. (c) Pure minoxidil. (d) Au NPs aggregation in the presence of minoxidil.
